# Supplementary material for: Development of Lung Adenocarcinomas with Exclusive Dependence on Oncogene Fusions
Source: Oxford University Press journal article supplement (doi:10.1158/0008-5472.can-14-3282), 2015-04-08
Supplement: 00085472can143282-sup-140622_1_supp_2874294_nkkvv5.xlsx [file 00085472can143282-sup-140622_1_supp_2874294_nkkvv5.xlsx]

## Sheet: Sup Table S2
	Supplementary Table S2. Clinical and pathological characteristics of the 608 lung adenocarcinomas of the NCC cohort
					Driver fusion					Driver mutation							Pan-negative
	Variable		All		Total	ALK	RET	ROS1		Total	EGFR	KRAS	HER2	BRAF	HRAS				P1
	Cases-no. (%)		608		50 (8.2)	23	13	14		361 (59.4)	282	61	12	6	0		197 (32.4)
	Age (y)																		0.0037
		Median	61		57	55	62	59		61	61	60	66.5	53.5			62
		Range	28-88		28-78	30-68	28-78	40-68		31-88	31-88	37-82	50-70	44-64			34-81
	Gender-no. (%)																		<0.0001
		Male	332 (54.6)		18 (36.0)	8	7	3		172 (47.6)	116	44	6	6			143 (72.6)
		Female	274 (45.1)		32 (64.0)	15	6	11		189 (52.4)	166	17	6	0			54 (27.4)
	Smoking (pack year)-no. (%)																		<0.0001
		Never	273 (44.9)		37 (74.0)	16	10	11		185 (51.2)	161	17	7	0			52 (26.4)
		<20	76 (12.5)		4 (8.0)	3	0	1		55 (15.2)	50	4	0	1			18 (9.1)
		≥20	255 (41.9)		9 (18.0)	4	3	2		121 (33.5)	71	40	5	5			127 (64.5)
	TNM stage-no. (%)																		0.0055
		I	269 (44.2)		18 (36.0)	7	5	6		179 (46.6)	150	21	6	2			72 (36.5)
		II	158 (26.0)		20 (40.0)	10	6	4		89 (24.7)	66	22	1	0			49 (24.9)
		III	168 (27.6)		12 (24.0)	6	2	4		86 (23.8)	61	16	5	4			70 (35.5)
		IV	13 (2.1)		0	0	0	0		7 (1.9)	5	2	0	0			6 (3.1)
	1P value was derived from the comparison between driver fusion, driver mutation and pan-negative cases by Kruskal-Wallis test or two-sided Chi-square test, where appropriate.
