# Supplementary material for: Development of Lung Adenocarcinomas with Exclusive Dependence on Oncogene Fusions
Source: Oxford University Press journal article supplement (doi:10.1158/0008-5472.can-14-3282), 2015-04-08
Supplement: 00085472can143282-sup-140622_1_supp_2874295_nkk445.xlsx [file 00085472can143282-sup-140622_1_supp_2874295_nkk445.xlsx]

## Sheet: Sup Table S3 
	Supplementary Table S3. Top 50 significantly mutated genes deduced by MutSigCV analysis
	No.	Gene	CGC	SMGs	Significance levels (p value)	False-discovery rate (q value)
	1	CTNNB1	y	y	0	0
	2	ERRFI1			0	0
	3	KRAS	y	y	0	0
	4	PTHLH			0	0
	5	RBM10			0	0
	6	SELPLG			0	0
	7	STK11	y	y	0	0
	8	TPSD1			0	0
	9	TP53	y	y	4.44089e-16	9.23212e-13
	10	EGFR	y	y	1.44329e-15	2.7004e-12
	11	CDKN2A	y	y	5.57531e-09	9.4831e-06
	12	APC	y	y	8.4738e-08	0.000132121
	13	RB1	y	y	6.30245e-07	0.000907068
	14	CHD8			5.32471e-06	0.00711609
	15	ARID1A	y	y	2.01172e-05	0.0250928
	16	SMAD4		y	2.45055e-05	0.0286561
	17	TRAPPC6B			4.58565e-05	0.0504691
	18	C8orf22			7.80311e-05	0.081109
	19	SFTPB			0.000134729	0.132673
	20	CFHR3			0.000174635	0.163371
	21	ANP32C			0.000195113	0.173695
	22	PTH2			0.000204238	0.173695
	23	KCNN3			0.000218092	0.177413
	24	RLIM			0.000231219	0.177548
	25	DCAF8L2			0.000245492	0.177548
	26	NXPE4			0.000246726	0.177548
	27	SEMG1			0.000296866	0.205717
	28	OR4D11			0.00031545	0.210788
	29	SMARCA4	y		0.00036847	0.237727
	30	OR2G3			0.000381608	0.237996
	31	MUC17			0.000424078	0.255951
	32	WNT6			0.000532089	0.311106
	33	BAP1	y	y	0.000572486	0.324582
	34	SFTPC			0.000608443	0.334823
	35	NTSR2			0.000657779	0.35163
	36	ELL2			0.000699793	0.363698
	37	C1orf173			0.000756055	0.376161
	38	LSAMP			0.000780919	0.376161
	39	SLC39A12			0.000784089	0.376161
	40	NUFIP1			0.00089107	0.416798
	41	PRUNE2			0.000948956	0.433048
	42	TCTN2			0.00111492	0.49667
	43	OR2G2			0.00115052	0.498454
	44	TRIM77			0.00117221	0.498454
	45	XKR5			0.00120572	0.501314
	46	MAX	y		0.00130048	0.528957
	47	OTUD5			0.00136876	0.541924
	48	POTEC			0.00140892	0.541924
	49	NXPE2			0.00141926	0.541924
	50	MAGEB5			0.0015433	0.577504
