# Supplementary material for: Development of Lung Adenocarcinomas with Exclusive Dependence on Oncogene Fusions
Source: Oxford University Press journal article supplement (doi:10.1158/0008-5472.can-14-3282), 2015-04-08
Supplement: 00085472can143282-sup-140622_1_supp_2874297_nkkvv5.xlsx [file 00085472can143282-sup-140622_1_supp_2874297_nkkvv5.xlsx]

## Sheet: Sup Table S5
	Supplementary Table S5. Mutation frequency of the 127 SMGs for 20 cellular processes in the study and TCGA cohort samples
			Our study
		Gene	All cases (n=200)	Fusion (n=31)	Mutation (n=96)	Pan-negative (n=73)		TCGA (n=228)
	Transcription factor/regulator	VHL	0	0	0	0		0
		GATA3	1	0	0	2.7		2.6
		TSHZ3	5.5	0	2.1	12.3		14.9
		EP300	0.5	0	0	1.4		0.9
		CTCF	1	0	0	2.7		1.3
		TAF1	2.5	3.2	1	4.1		4
		TSHZ2	5.5	0	5.2	8.2		6.6
		RUNX1	1	0	0	2.7		0.4
		MECOM	1	0	0	2.7		3.5
		TBX3	2	0	1	4.1		4.4
		SIN3A	2	0	2.1	2.7		1.8
		WT1	1.5	0	0	4.1		3.5
		EIF4A2	0	0	0	0		1.8
		FOXA1	1	0	2.1	0		0.4
		PHF6	0	0	0	0		0.9
		CBFB	0	0	0	0		0.4
		SOX9	1	0	1	1.4		1.3
		ELF3	0	0	0	0		0.4
		VEZF1	0	0	0	0		0.9
		CEBPA	0	0	0	0		0
		FOXA2	0	0	0	0		0
	Histone modifier	MLL3	4.5	0	4.2	6.8		18.4
		MLL2	5	6.5	2.1	8.2		8.8
		ARID1A	4	0	0	11		6.1
		PBRM1	3	3.2	0	6.8		1.8
		SETD2	4.5	9.7	2.1	5.5		7.9
		NSD1	3.5	0	3.1	5.5		3.1
		SETBP1	5	0	3.1	9.6		12.7
		KDM5C	1.5	0	0	4.1		4.8
		KDM6A	2	0	1	4.1		0.9
		MLL4	1.5	0	2.1	1.4		1.8
		ARID5B	1	0	0	2.7		2.2
		ASXL1	1	0	1	1.4		1.3
		EZH2	0.5	0	0	1.4		2.2
	Genome integrity	TP53	37.5	16.1	42.7	39.7		51.8
		ATM	4	0	2.1	8.2		7.9
		ATRX	4	0	3.1	6.8		6.1
		BRCA2	1.5	0	1	2.7		5.7
		ATR	2	0	1	4.1		5.7
		STAG2	2	6.5	1	1.4		2.6
		BAP1	2	6.5	2.1	0		1.3
		BRCA1	1.5	0	1	2.7		3.5
		SMC1A	2	3.2	1	2.7		1.3
		SMC3	1	0	0	2.7		2.6
		CHEK2	1.5	0	1	2.7		0.9
		RAD21	1	0	1	1.4		2.6
		ERCC2	2	0	2.1	2.7		1.3
	RTK signaling	EGFR	36	0	75	0		11.4
		FLT3	1	0	1	1.4		4
		EPHA3	5.5	0	3.1	11		8.8
		ERBB4	3	0	3.1	4.1		7.5
		PDGFRA	4	0	5.2	4.1		6.6
		EPHB6	3	3.2	1	5.5		9.7
		FGFR2	0	0	0	0		3.1
		KIT	0.5	0	1	0		1.8
		FGFR3	0	0	0	0		0.4
	Cell cycle	CDKN2A	6.5	0	3.1	13.7		6.6
		RB1	3.5	0	3.1	5.5		5.3
		CDK12	0.5	0	0	1.4		3.1
		CDKN1B	0.5	0	0	1.4		1.8
		CCND1	0.5	0	0	1.4		0.9
		CDKN1A	0	0	0	0		0.4
		CDKN2C	0.5	0	1	0		0
	MAPK signalling	KRAS	8.5	0	17.7	0		26.3
		NF1	3	3.2	1	5.5		11.8
		MAP3K1	0.5	0	0	1.4		1.8
		BRAF	1	0	2.1	0		6.6
		NRAS	0	0	0	0		1.8
		MAP2K4	1	0	1	1.4		1.3
		MAPK8IP1	0	0	0	0		1.8
	PI(3)K signaling	PIK3CA	3.5	6.5	2.1	4.1		4.4
		PTEN	1	0	1	1.4		2.2
		PIK3R1	2.5	0	2.1	4.1		1.3
		TLR4	2.5	3.2	1	4.1		11.4
		PIK3CG	3	0	1	6.8		5.3
		AKT1	0	0	0	0		0
	TGF-b signaling	SMAD4	2.5	0	2.1	4.1		3.1
		TGFBR2	1	0	0	2.7		0.9
		ACVR1B	1.5	0	0	4.1		2.2
		SMAD2	1	0	0	2.7		0.9
		ACVR2A	1	3.2	0	1.4		0.9
	Wnt/b-catenin signaling	APC	6.5	3.2	6.3	8.2		9.2
		CTNNB1	5.5	6.5	8.3	1.4		3.5
		AXIN2	2.5	3.2	1	4.1		0.9
		TBL1XR1	0	0	0	0		2.2
		SOX17	2.5	0	2.1	4.1		0.4
	Histon	HIST1H1C	0	0	0	0		0.4
		H3F3C	0.5	0	0	1.4		1.8
		HIST1H2BD	0.5	0	0	1.4		0
	Proteolysis	FBXW7	0.5	0	1	0		1.3
		KEAP1	3	0	1	6.8		17.1
		SPOP	0	0	0	0		0.4
	Splicing	SF3B1	1.5	3.2	0	2.7		2.2
		U2AF1	0.5	0	1	0		2.6
		PCBP1	0	0	0	0		0.4
	HIPPO signaling	CDH1	0.5	0	1	0		1.3
		AJUBA	0	0	0	0		0.9
	DNA methylation	DNMT3A	0	0	0	0		4
		TET2	2.5	0	3.1	2.7		3.1
	Metabolism	IDH1	0.5	0	1	0		0.9
		IDH2	0	0	0	0		0.4
	NFE2L	NFE2L2	1	0	0	2.7		2.2
		NFE2L3	0.5	0	0	1.4		0
	Protein phosphatase	PPP2R1A	0.5	0	1	0		1.3
		PTPN11	0	0	0	0		2.6
	Ribosome	RPL22	0	0	0	0		0.4
		RPL5	0	0	0	0		0.4
	TOR signaling	MTOR	0.5	0	0	1.4		7.5
		STK11	6	0	4.2	11		8.8
	Other	NAV3	7	0	5.2	12.3		21.5
		NOTCH1	2	0	2.1	2.7		3.1
		LRRK2	2.5	0	2.1	4.1		6.6
		MALAT1	0	0	0	0		9.7
		ARHGAP35	2.5	0	4.2	1.4		4
		POLQ	4	0	3.1	6.8		5.7
		NCOR1	2.5	0	3.1	2.7		2.6
		USP9X	3	0	2.1	5.5		5.3
		NPM1	0	0	0	0		0.9
		HGF	3	0	1	6.8		10.5
		EPPK1	4	3.2	0	9.6		3.1
		AR	3.5	3.2	2.1	5.5		1.8
		LIFR	1.5	0	1	2.7		0.9
		PRX	1	0	1	1.4		0.4
		CRIPAK	1	0	2.1	0		5.3
		EGR3	0	0	0	0		0.4
		B4GALT3	0	0	0	0		0
		MIR142	0	0	0	0		0
	Percentages of cases mutated in each groups are shown
	EGFR, KRAS, BRAF, PIK3CA, AKT1 and U2AF1, only hot spot mutations were counted.
