# Supplementary material for: Development of Lung Adenocarcinomas with Exclusive Dependence on Oncogene Fusions
Source: Oxford University Press journal article supplement (doi:10.1158/0008-5472.can-14-3282), 2015-04-08
Supplement: 00085472can143282-sup-140622_1_supp_2874348_nkknn5.xlsx [file 00085472can143282-sup-140622_1_supp_2874348_nkknn5.xlsx]

## Sheet: Sup Table S6
	Supplementary Table S6. Comparison of gene mutations between the study cohort and the TCGA cohort
			Our study cohort					TCGA cohort
		Gene	All cases	Fusion	Mutation	Pan-negative		All cases	Fusion	Mutation	Pan-negative
	Cases-no. (%)		200	31 (15.5)	96 (48.0)	73 (36.5)		230	9 (4.0)	121 (53.1)	100 (43.9)
	Genes-no. (%)
		TP53	75 (37.5)	5 (16.1)	41 (42.7)	29 (39.7)		105 (45.7)	1 (11.1)	47 (38.8)	57 (57.0)
		CDKN2A	13 (6.5)	0	3 (3.1)	10 (13.7)		9 (3.9)	1 (11.1)	4 (3.3)	4 (4.0)
		STK11	12 (6.0)	0	4 (4.2)	8 (11.0)		40 (17.4)	0	23 (19.0)	17 (17.0)
		RBM10	11 (5.5)	0	5 (5.2)	6 (8.2)		19 (8.3)	0	14 (11.6)	5 (5.0)
		SETD2	9 (4.5)	3 (9.7)	1 (1.0)	5 (6.8)		20 (8.7)	2 (22.2)	11 (9.1)	7 (7.0)
		SMARCA4	9 (4.5)	0	0	9 (12.3)		13 (5.7)	2 (22.2)	3 (2.5)	8 (8.0)
		ARID1A	8 (4.0)	0	0	8 (11.0)		16 (7.0)	0	9 (7.4)	7 (7.0)
		RB1	7 (3.5)	0	3 (3.1)	4 (5.5)		10 (4.4)	0	4 (3.3)	6 (6.0)
		PIK3CA	7 (3.5)	2 (6.5)	2 (2.1)	3 (4.1)		15 (6.5)	0	6 (5.0)	9 (9.0)
		NF1	6 (3.0)	1 (3.2)	1 (1.0)	4 (5.5)		26 (11.3)	0	3 (2.5)	23 (23.0)
		KEAP1	6 (3.0)	0	1 (1.0)	5 (6.8)		4 (17.4)	0	17 (14.0)	23 (23.0)
		MET	5 (2.5)	1 (3.2)	1 (1.0)	3 (4.1)		16 (7.0)	0	5 (4.1)	11 (11.0)
		MGA	2 (1.0)	0	1 (1.0)	1 (1.4)		19 (8.3)	0	8 (6.6)	11 (11.0)
		U2AF1	1 (0.5)	0	1 (1.0)	0		8 (3.5)	1 (11.1)	5 (4.1)	2 (2.0)
		RIT1	1 (0.5)	0	1 (1.0)	0		5 (2.2)	0	0	5 (5.0)
		AKT1	0	0	0	0		2 (0.8)	0	1 (0.8)	1 (1.0)
